# Supplementary material for: Comparison of Physicochemical Characteristics and Sensory Attributes of Four Different Chicken Breeds from the Genuine and Selected Local Market
Source: Hindawi journal article supplement (doi:10.1155/2022/1419937), 2022-04-13
Supplement: f1 [file 1419937.f1.docx]

**SUPPLEMENTARY MATERIALS**

**Table S1**. Information of the chicken breeds obtained from genuine suppliers

| **No** | **Type of chicken** | **Breed** | **Feed** | **Location** | **Temperature (°C)** | **Humidity** | **Male & female separation** |
| --- | --- | --- | --- | --- | --- | --- | --- |
| 1 | Village | - | Pellet Gold Coin, CP, mix feed | Ladang Pahang Tua, Pahang | 25-28 | 50-60% | 67 (17M, 50F) |
| 2 | Colored | Hubbard | Pellet, own formulation | Ladang Permatang Tinggi, Penang | 25-28 | 50-60% | 67 (17M, 50F) |
| 3 | Broiler | COBB | Pellet, own formulation | Ladang Bukit Mertajam, Penang | 28 | 50-60% | 67 (17M, 50F) |
| 4 | Layer | - | Pellet, own formulation | Ladang Butterworth, Penang | 25-28 | 50-60% | 67 F |

M= Male, F= Female


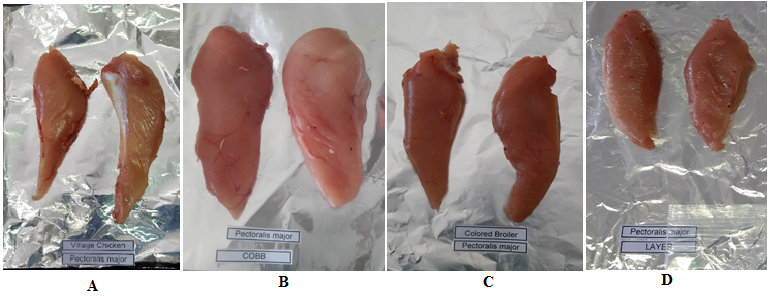


**Figure S1.** Portions of chicken breast (Pectoralis major) from all different chicken namely breeds village chicken (A), broiler chicken (Cobb) (B), colored chicken (Hubbard) (C) and layer chicken (D).

**Table S2.** Information of the chicken breeds collected from different local markets

| **Type of chicken** | **Location of the markets** | **Abbreviation** |
| --- | --- | --- |
| Village chicken | 1. Jaya Grocer, Bangi 2. Az Zain Mart, Bangi 3. Pasar Basah, Sg Besi 4. Marina Mart, Sri Serdang 5. Pasar Basah, Sri Serdang 6. Mini Mart, Sri Serdang 7. Pasar Basah, Kajang 8. Pasar Basah, Bangi 9. En Afiq Ent, UPM 10. Shahrul Frozen Mart, Cheras | MVC 1  MVC 2  MVC 3  MVC 4  MVC 5  MVC 6  MVC 7  MVC 8  MVC 9  MVC 10 |
| Colored chicken | 1. Pasar Basah, Kajang 2. Pasar Basah, Seri Kembangan 3. En Yus, Serdang | MCC 1  MCC 2  MCC 3 |
| Broiler chicken | 1. Pasaraya Tesco, IOI Putrajaya 2. Big Hero Mart, Sri Serdang 3. Whole Fruit Market Sdn. Bhd. Cheras | MBC 1  MBC 2  MBC 3 |
| Layer chicken | 1. Pasaraya Giant, Bangi 2. Pasar Basah, Bangi 3. Pasar Basah, Sri Serdang | MLC 1  MLC 2  MLC 3 |

**Table S3**. Sensory attributes and definitions for descriptive sensory analysis.

| **Name of attributes** | **Definitions** | **How to determine** | **Reference materials** | **Minimal and maximal specifications** |
| --- | --- | --- | --- | --- |
| Intensity of taste | The overall intensity of taste | Use Q-tip at the sensory receptor. | 25ml water:  2.0g Sucrose  0.2g NaCl  0.1g Citric acid  0.1g Caffeine  0.1g MSG | Week to very intensive |
| Sweet taste | Intensity of sweetness | Spread the sample on the tongue surface within 5 seconds. | Not perceivable to highly perceivable |
| Sour taste | The intensity of sour taste |
| Salty taste | The intensity of salty taste |
| Bitter taste | The intensity of bitter taste |
| Umami taste | Intensity of MSG |
| ‘Metallic-blood-like’ taste | The intensity of metallic or blood-like taste |
| Meaty taste | The intensity of meaty taste  (cooked chicken) |
| Appetizing | The appearance that could stimulate one’s appetite | Observe the sample  (pictures) | Cake:  Min: Overcooked (burnt)  Max: Banana Cake  Bread:  Min: Burnt toast  Max: Fresh loaf  Fruits:  Min: Rotten fruits  Max: Fresh fruits | Gross to appealing |
| Colour (meat) | Intensity of colour on surface | Observe the colour intensity on the surface | Colour pictures |  |
| Intensity of smell | The overall intensity of the smell | Von Skramlik Test:  Smell the sample immediately after open-up the container |  | Week to intensive |
| Meaty smell | The intensity of smell like cooked meat, blood | Von Skramlik Test:  Smell the sample immediately after open-up the container | Chicken broth | Not perceivable to highly perceivable |
| Aromatic | Have a pleasant and distinctive smell | Von Skramlik Test:  Smell the sample immediately after open-up the container | **Herbs:** Oregano flakes  **Spicy:** Red chilli  **Pungent:** Belacan bakar  **Sweet-smelling**: Pineapple, orange | Not perceivable to highly perceivable |
| Firmness / consistency | Power to divide the sample with the incisors. | Use your incisor and start biting on the surface to bite a 1cm piece off. | **Min:** Soft cheese  **Middle:** Gouda cheese  **Max:** Carrot | Soft: Incisors cut the sample easily  Firm: Sample crushes |
| Juiciness | Amount of juice while chewing | Chewing with the molars for two to three times | **Min:** Banana  **Middle:** Cucumber  **Max:** Orange | Not juicy to highly juicy |
| Adhesiveness | Coherence while chewing and adhesin to the molars. | Chewing with the molars for two to three times | **Min:** Cucumber  **Middle:** Gouda cheese  **Max:** Dried fruits | Not adhesive to highly adhesive |
| Crumbliness | Amount of particle existing before swallowing and rate for coherence | Evaluation of the particles / fibres | **Min:** Mash potato  **Middle:** Gouda cheese  **Max:** Shortbread | Not crumbly to crumbly |
| Tenderness | The power needed to chew | Chewing until swallowing | **Min:** Jerky meat  **Max:** Seasoned apricot | Chewy to tender |

**1) Beige**

| 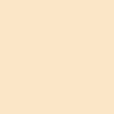 | 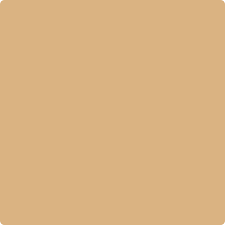 |
| --- | --- |

1 15

**2) Brown**

| 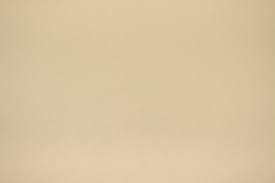 | 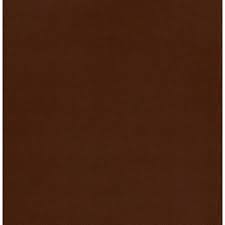 |
| --- | --- |

1 15

**3) Yellow**

| 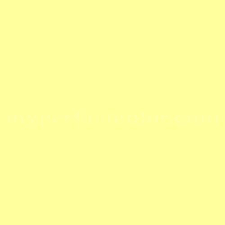 | 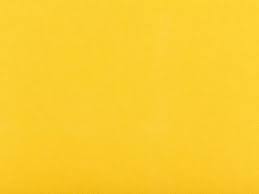 |
| --- | --- |

1 15

**4) Blueish-white**

| 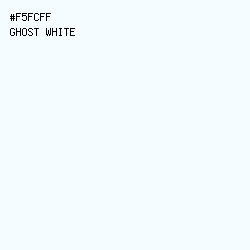 | 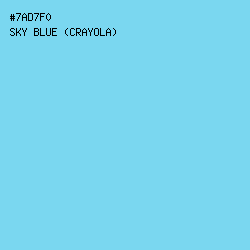 |
| --- | --- |

1 15

5) White

| 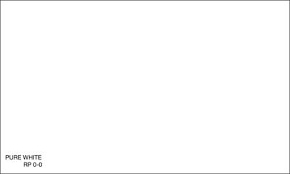 | 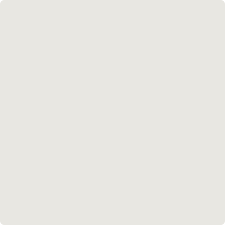 |
| --- | --- |

1 15

**Figure S2.** Intensity of colour on surface


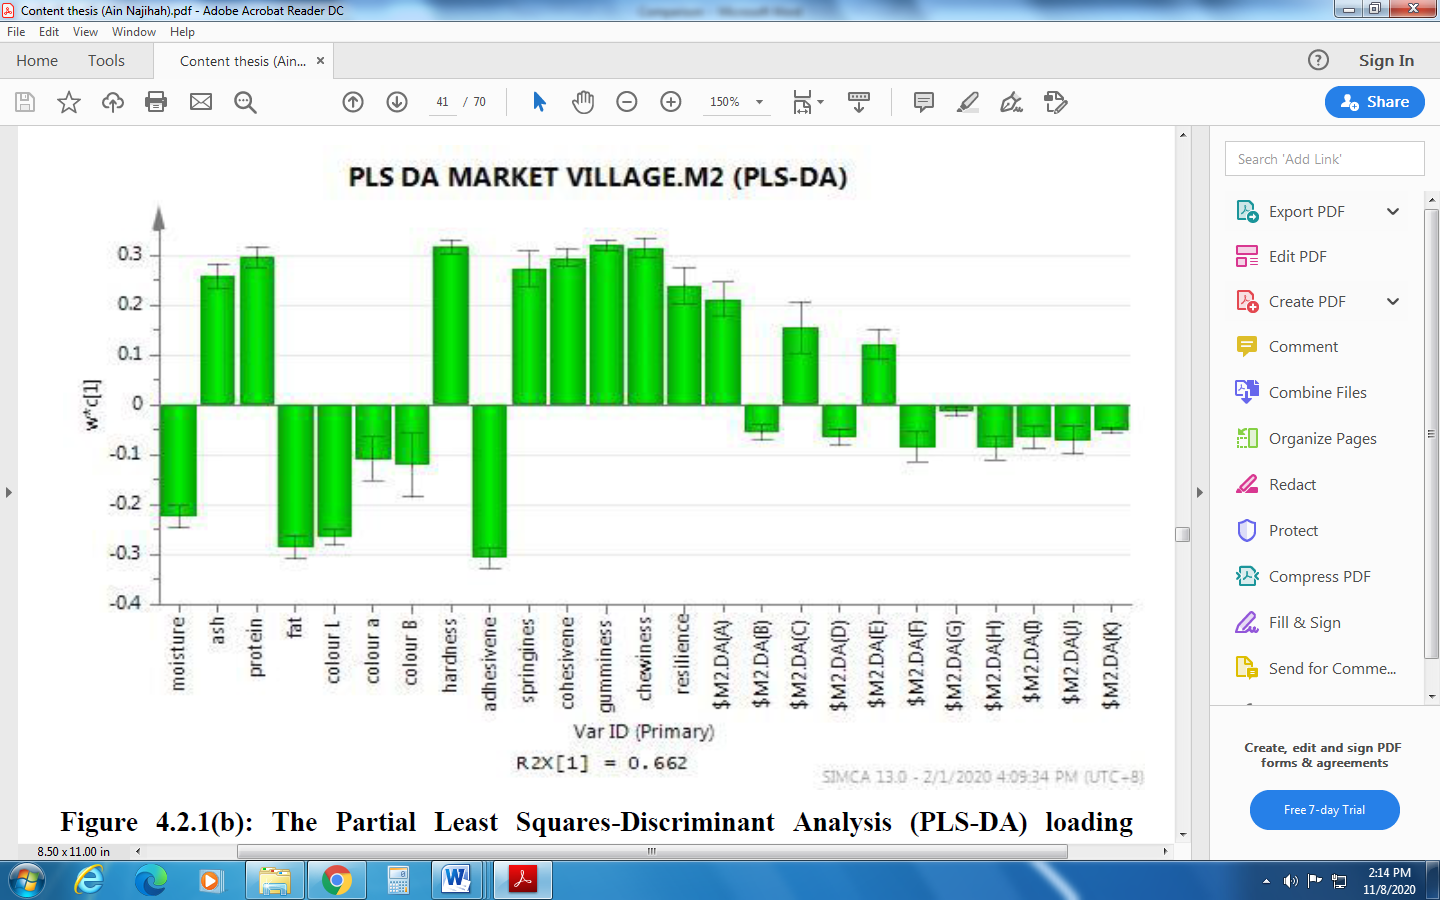


**Figure S3**. The Partial Least Squares-Discriminant Analysis (PLS-DA) loading column plot of control and market samples of village chicken. CVC = control village chicken, MVC 1 = market 1, MVC 2 = market 2, MVC 3 = market 3, MVC 4 = market 4, MVC 5 = market 5, MVC 6 = market 6, MVC 7 = market 7, MVC 8 = market 8, MVC 9 = market 9, MVC 10 = market 10


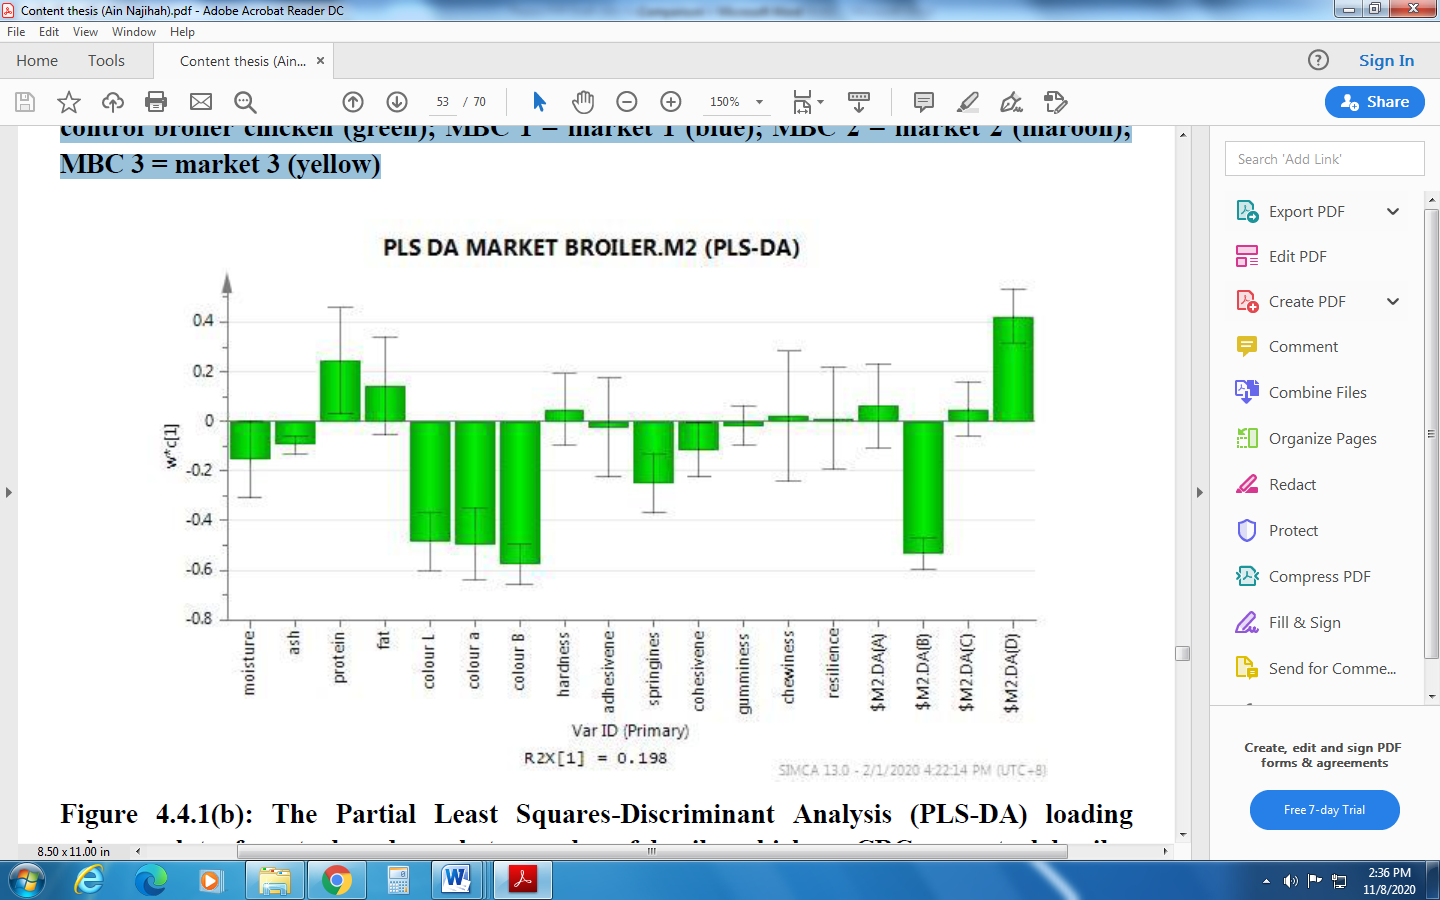


**Figure S4.** The Partial Least Squares-Discriminant Analysis (PLS-DA) loading column plot of control and market samples of broiler chicken. CBC = control broiler chicken, MBC 1 = market 1, MBC 2 = market 2, MBC 3 = market 3


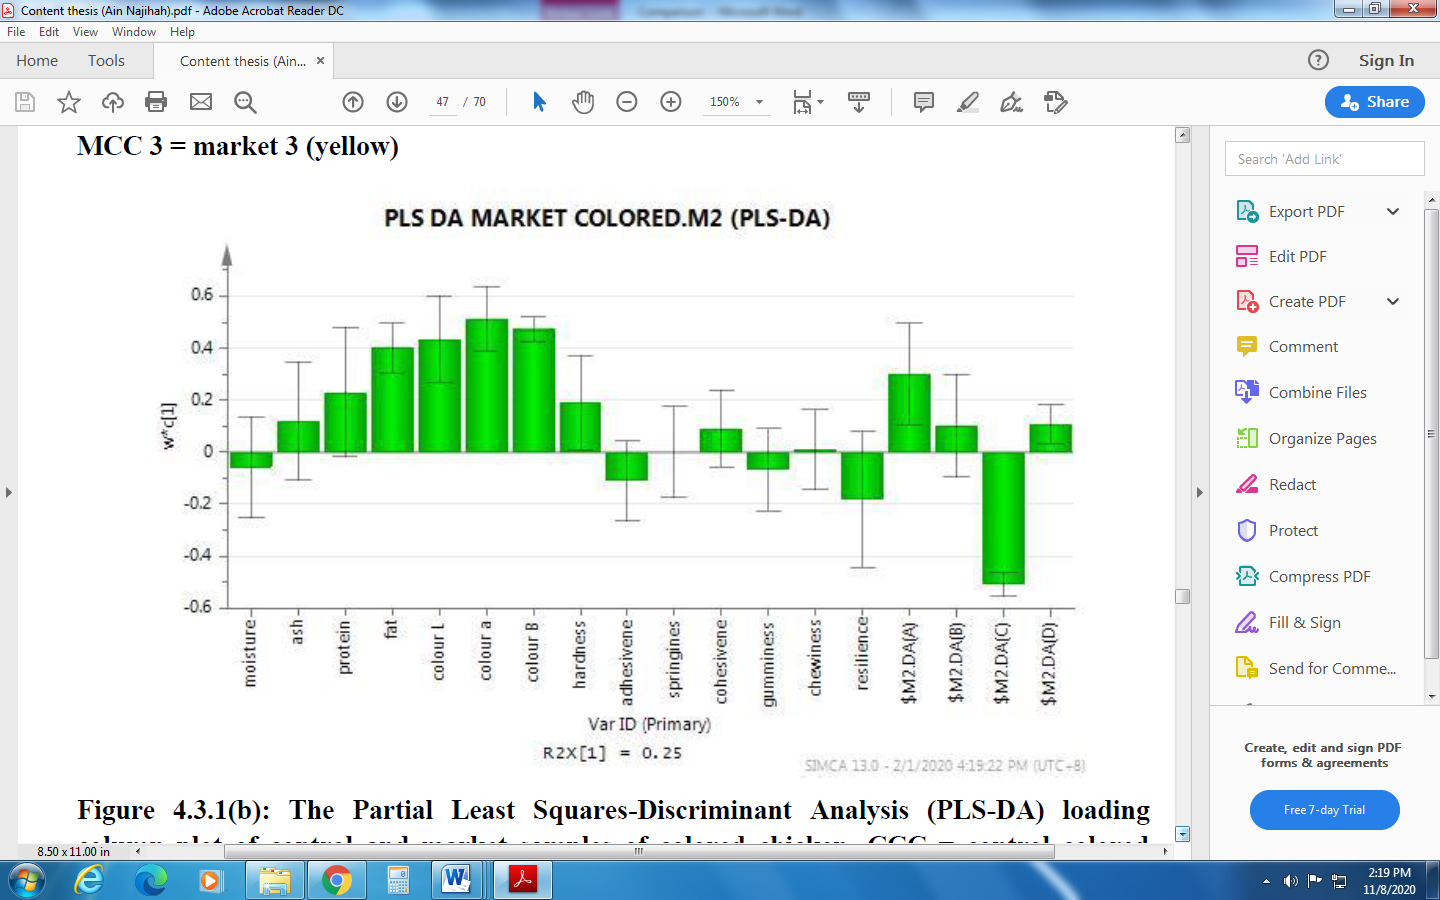


**Figure S5.** The Partial Least Squares-Discriminant Analysis (PLS-DA) loading scatter plot of control and market samples of colored chicken in terms of proximate, color and texture properties. A = control colored chicken, B = market 1, C = market 2, D = market 3


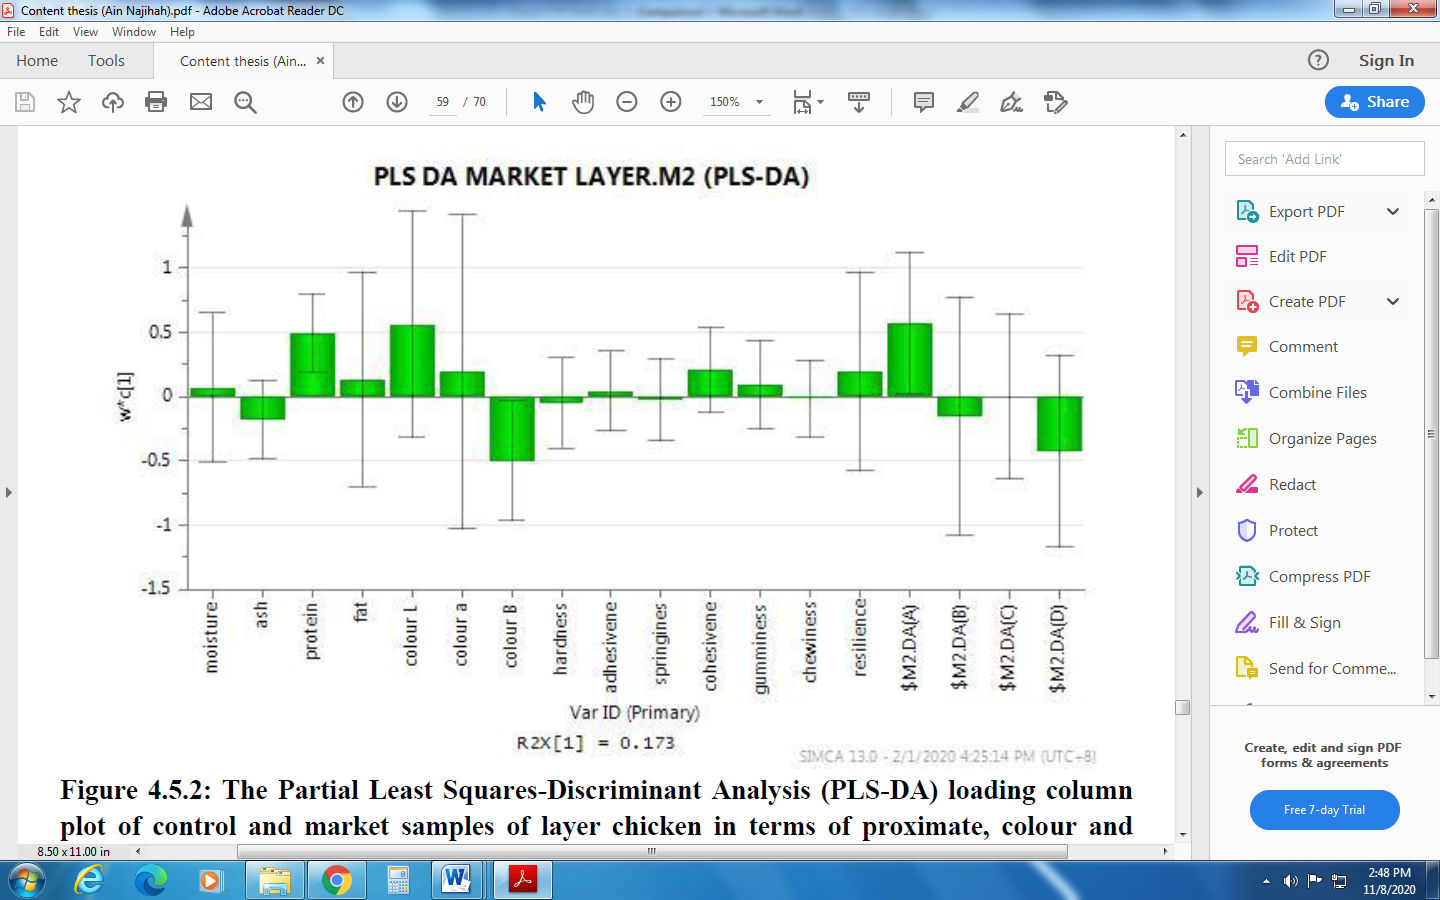


**Figure S6.** The Partial Least Squares-Discriminant Analysis (PLS-DA) loading column plot of control and market samples of layer chicken in terms of proximate, colour and texture properties. CLC = control layer chicken, MLC 1 = market 1, MLC 2 = market 2, MLC 3 = market 3
